# Supplementary material for: Relaxin 2/RXFP1 Signaling Induces Cell Invasion via the β-Catenin Pathway in Endometrial Cancer
Source: MDPI journal article supplement (doi:10.3390/ijms19082438), 2018-08-18
Supplement: s1 [file s1]

# Supplementary Materials: Relaxin 2/RXFP1 Signaling Induces Cell Invasion via the $\beta$ -Catenin Pathway in Endometrial Cancer

Misaki Fue, Yasuhiro Miki, Kiyoshi Takagi, Chiaki Hashimoto, Nobuo Yaegashi, Takashi Suzuki and Kiyoshi Ito

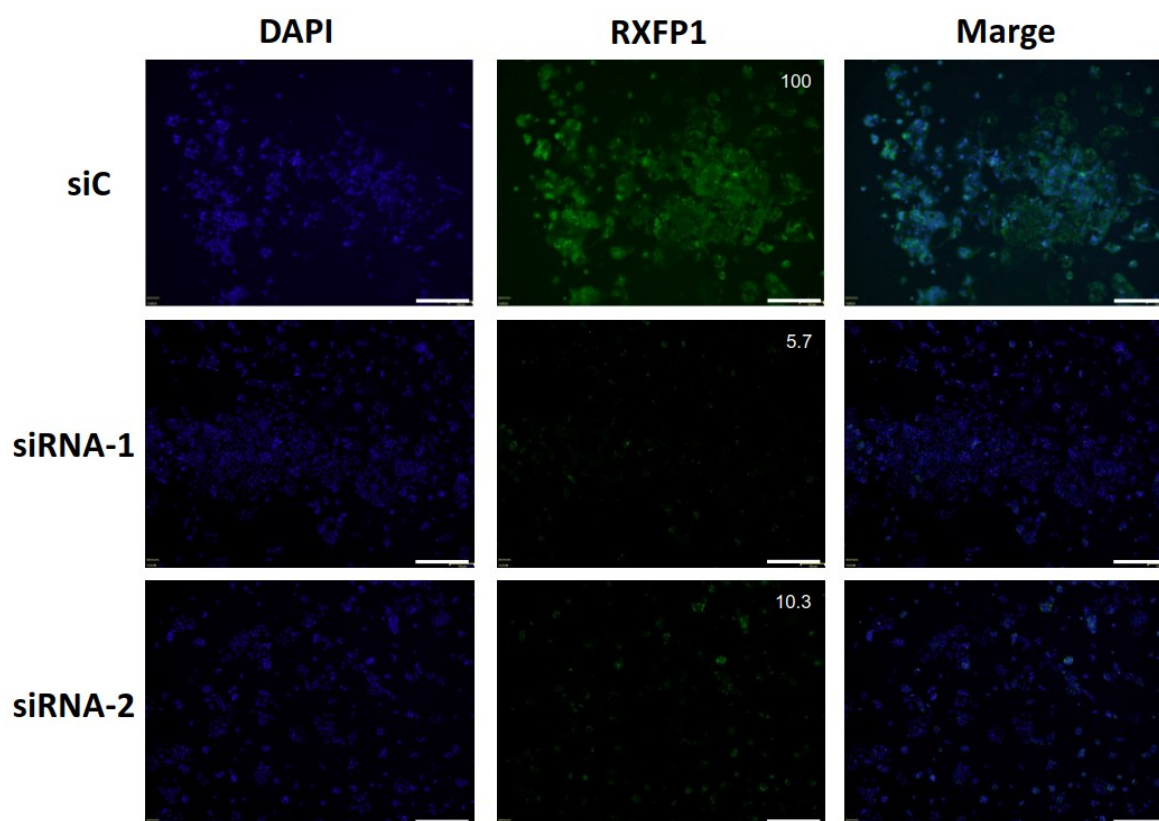

**Figure S1.** Immunofluorescence staining of RXFP1 after the transfection of HEC-1B with 2 different siRNA molecules. Relative intensity values normalized to the values at the control (siC = 100) are shown. Scale bar, 200  $\mu$ m.

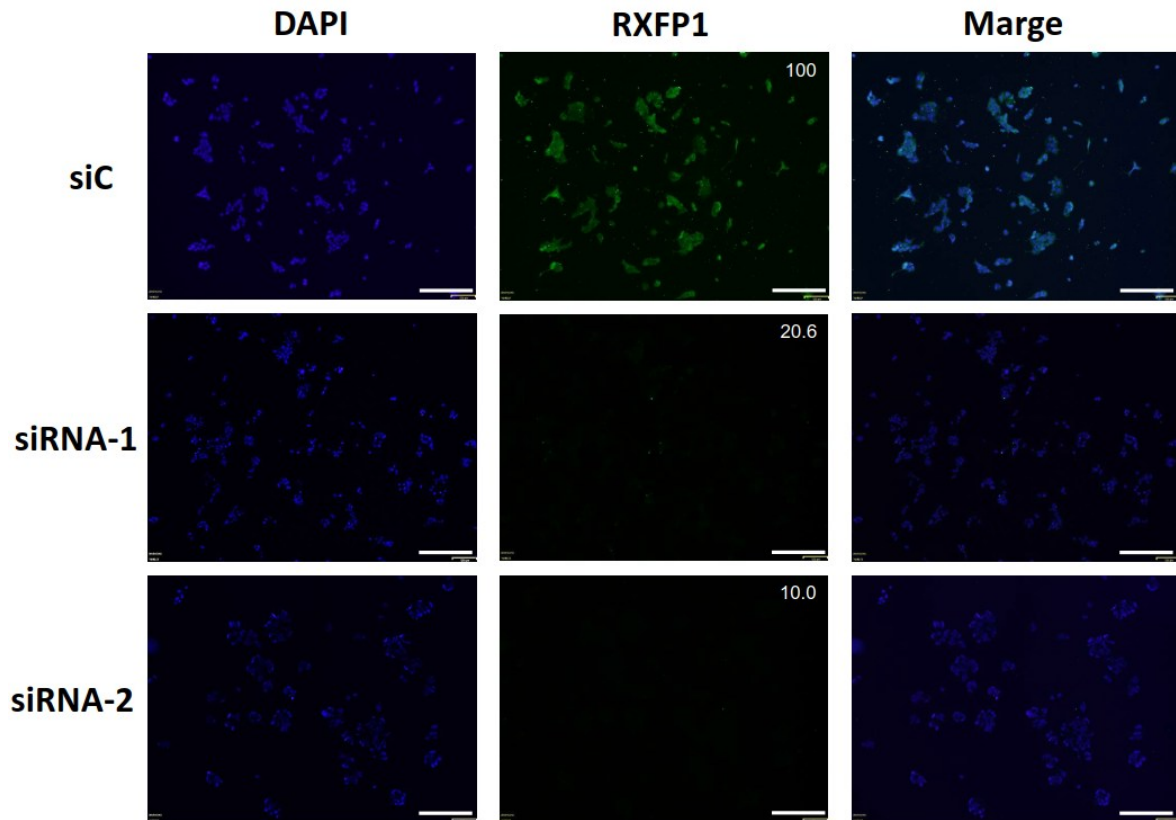

**Figure S2.** Immunofluorescence staining of RXFP1 after the transfection of Ishikawa with 2 different siRNA molecules. Relative intensity values normalized to the values at the control (siC = 100) are shown. Scale bar, 200  $\mu$ m.
